# Supplementary material for: Indocyanine green-loaded porphyrin covalent organic frameworks for photothermal cancer therapy
Source: Royal Society of Chemistry journal article supplement (doi:10.1039/d3qm01207g), 2024-01-01
Supplement: d3qm01207g1.pdf [file d3qm01207g1.pdf]

# Indocyanine green-loaded porphyrin covalent organic framework for photothermal cancer therapy

Simiao Tong<sup>a</sup>, Cheng Li<sup>a</sup>, Kai Wang,<sup>b</sup> Fengshou Wu<sup>a,\*</sup>

<sup>a</sup> Hubei Key Laboratory of Novel Reactor and Green Chemical Technology, Key Laboratory of Novel Biomass-Based Environmental and Energy Materials in Petroleum and Chemical Industry, School of Chemical Engineering and Pharmacy, Wuhan Institute of Technology, Wuhan, 430072, P. R. China. E-mail: wfs42@126.com.

<sup>b</sup> Ministry of Education Key Laboratory for the Synthesis and Application of Organic Functional Molecules, Hubei University, Wuhan 430062, People's Republic of China.

## Figures and Captions

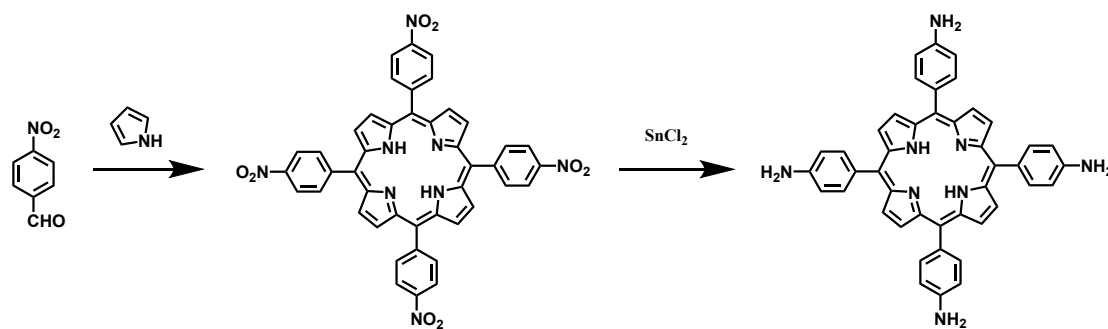

Figure S1. Synthesis route of 5,10,15,20-tetra(4-aminophenyl) porphyrin

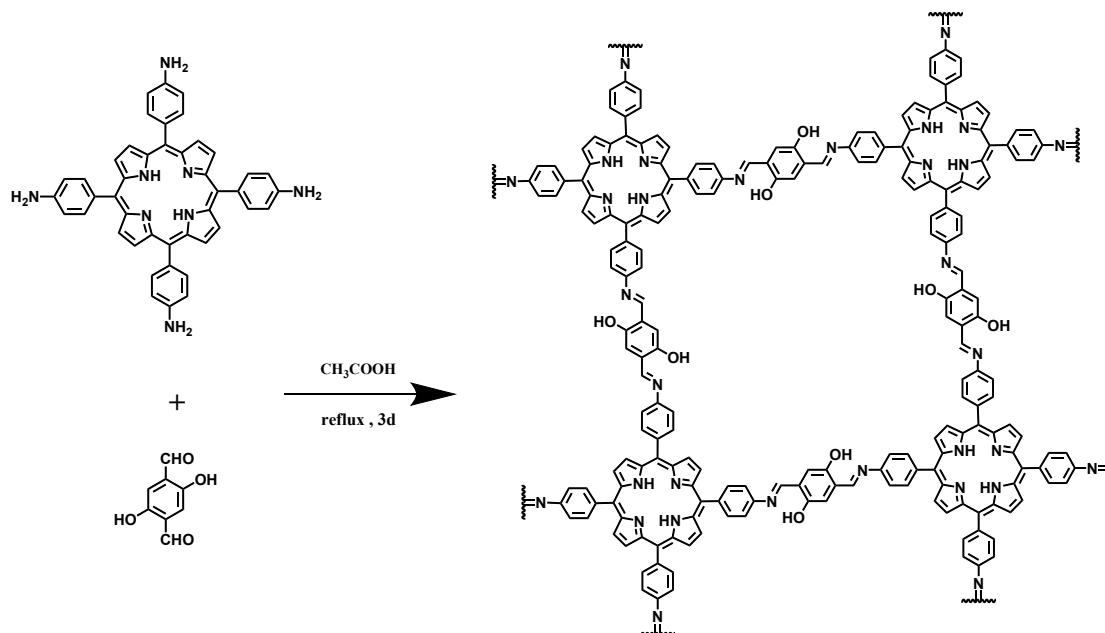

Figure S2. Synthesis route of COF-OH.

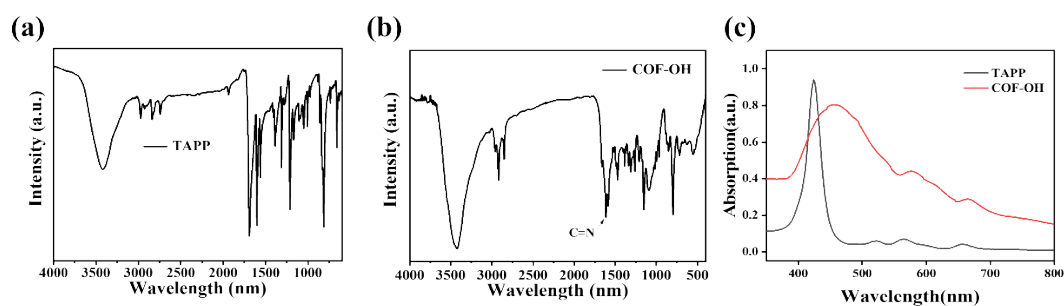

Figure S3. (a) FT-IR spectrum of TAPP; (b) FT-IR spectrum of COF-OH; (c) absorption spectra of TAPP and COF-OH.

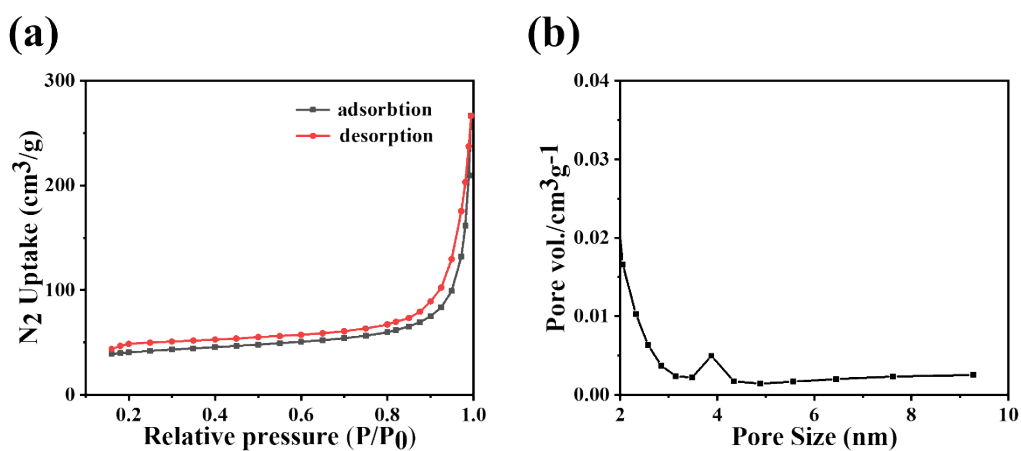

Figure S4. (a) Nitrogen adsorption and desorption isotherms of COF-OH; (b) Pore size distribution of COF-OH by DFT modeling.

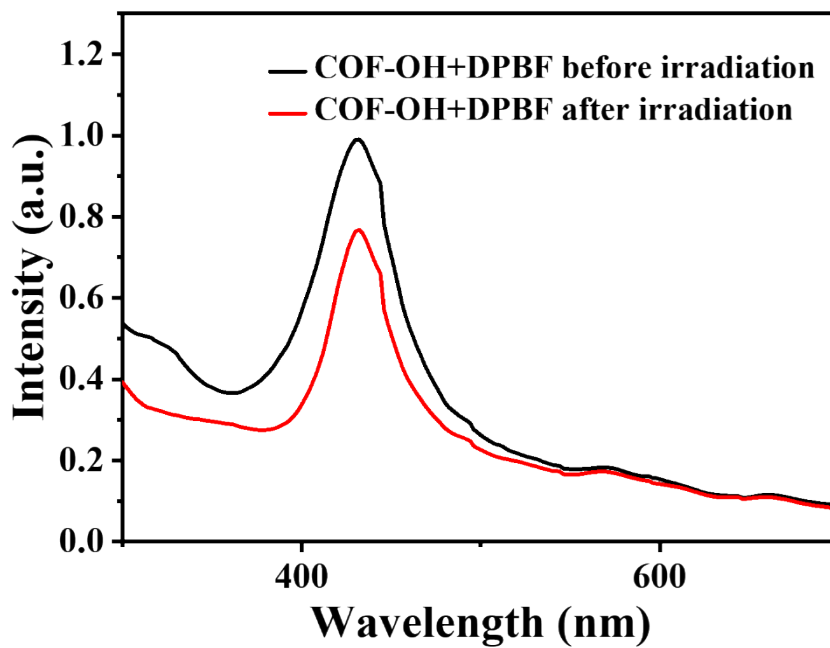

Figure S5. absorption spectra of COF-OH + DPBF before and after irradiation (660 nm, 0.05 W/cm<sup>2</sup>, 3 min).

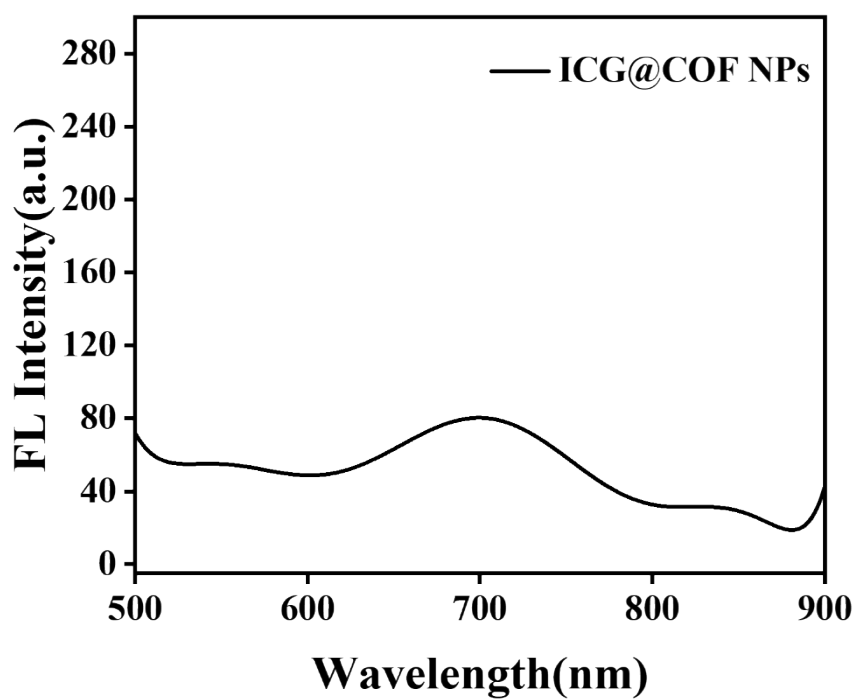

Figure S6. Fluorescence spectra of ICG@COF NPs; experimental conditions:  $\lambda_{\text{ex}}$  =460 nm, collection range: 500-900 nm.

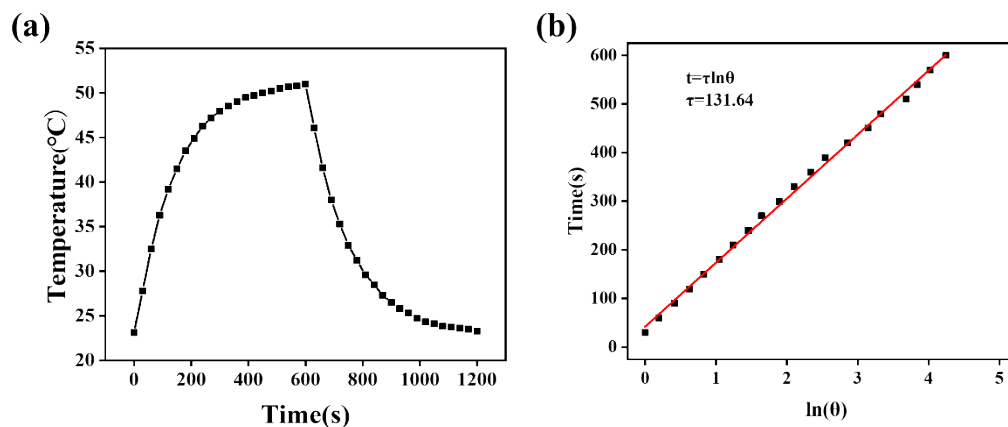

Figure S7. (a) Photothermal effects of 20  $\mu\text{g/mL}$  ICG@COF under 808 nm laser irradiation (1.0  $\text{W/cm}^2$ ) and cooled for 10 min without irradiation; (b) Linear relationship between the cooling period of time and the negative natural logarithm of temperature.
